# Supplementary material
Source: PubMed Central journal article supplement (PMC6420164)
Supplement: jiy608_suppl_supplementary_figure_s1.pdf [file jiy608_suppl_supplementary_figure_s1.pdf]

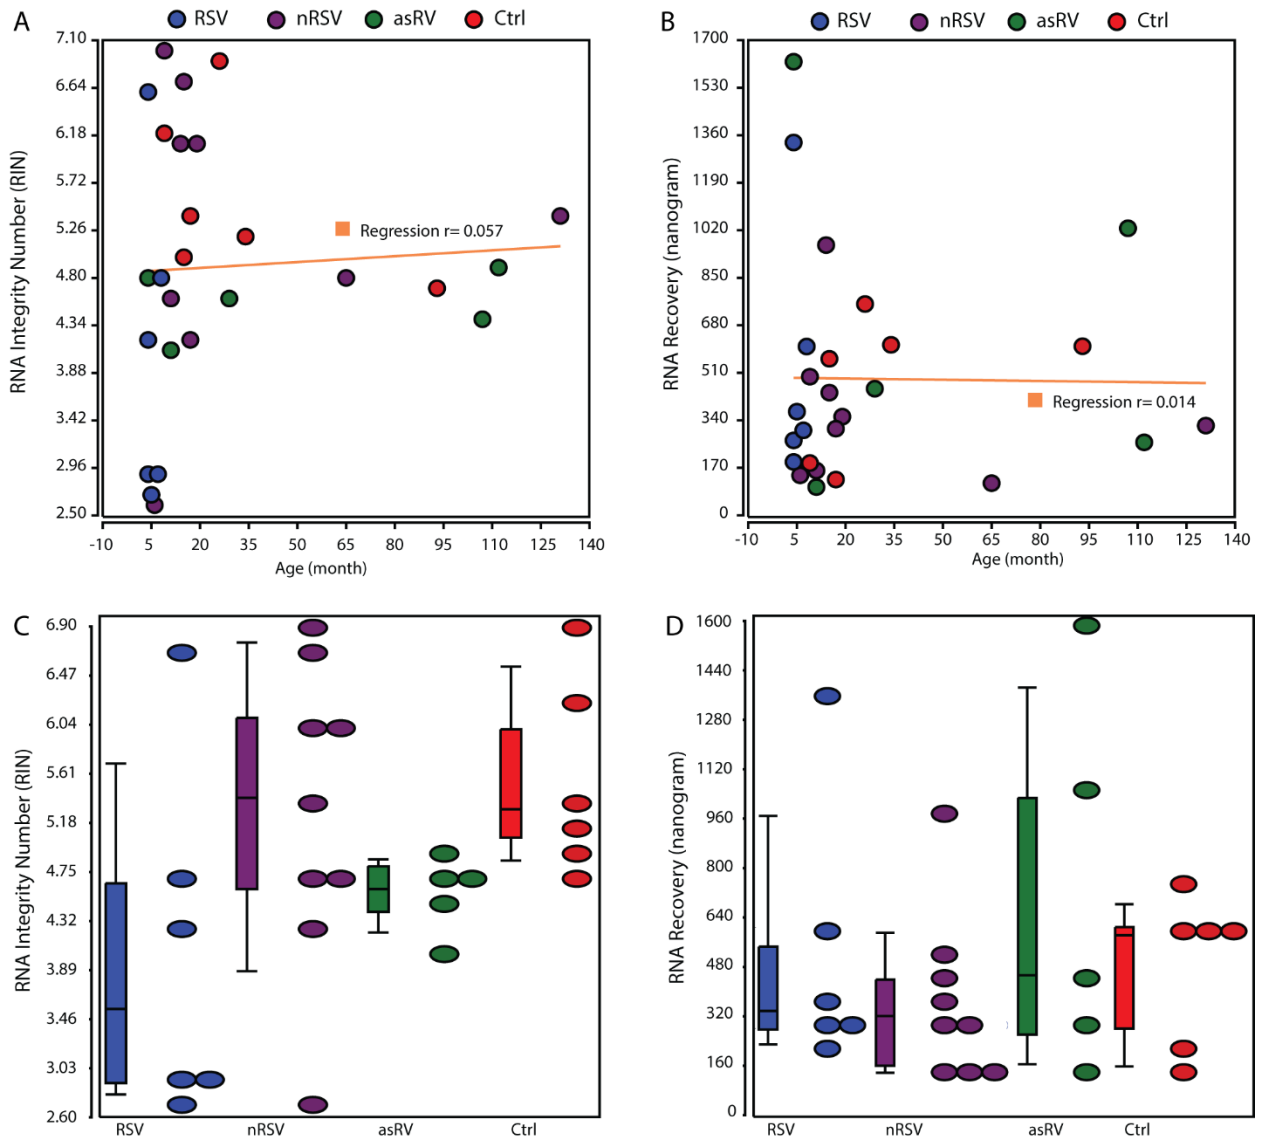

Figure S1. Relationships between RNA quality and quantity with age and study group. Panel A, RIN vs. age; Panel B, RNA recovery vs. age; Panel C, RIN vs. study group; panel D, RNA recovery vs. study group.
