# Supplementary material
Source: PubMed Central journal article supplement (PMC6420164)
Supplement: jiy608_suppl_supplementary_figure_s2.pdf [file jiy608_suppl_supplementary_figure_s2.pdf]

### A Blood Sample (Data in the present study (a) compared to data from the GEO database (b, c))

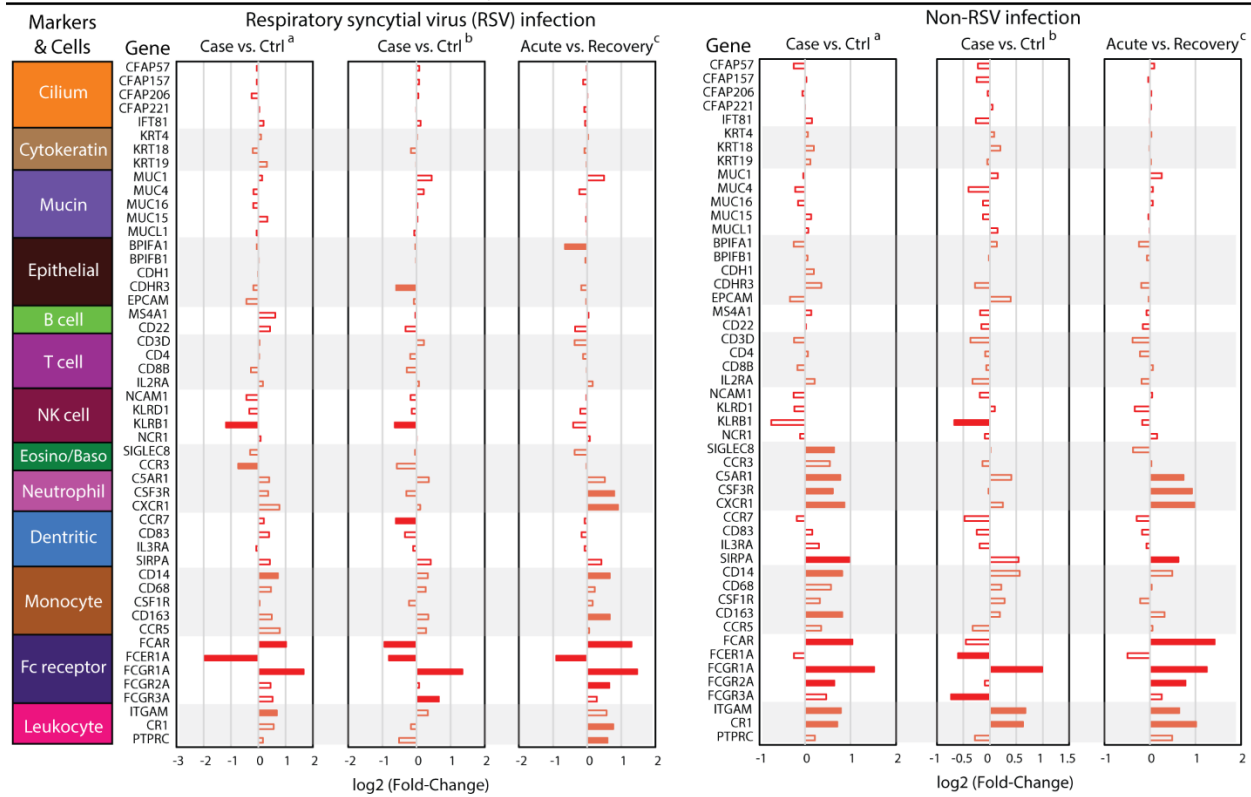

### B Nasal Sample (Data in the present study (a) compared to data from the GEO database (c-e))

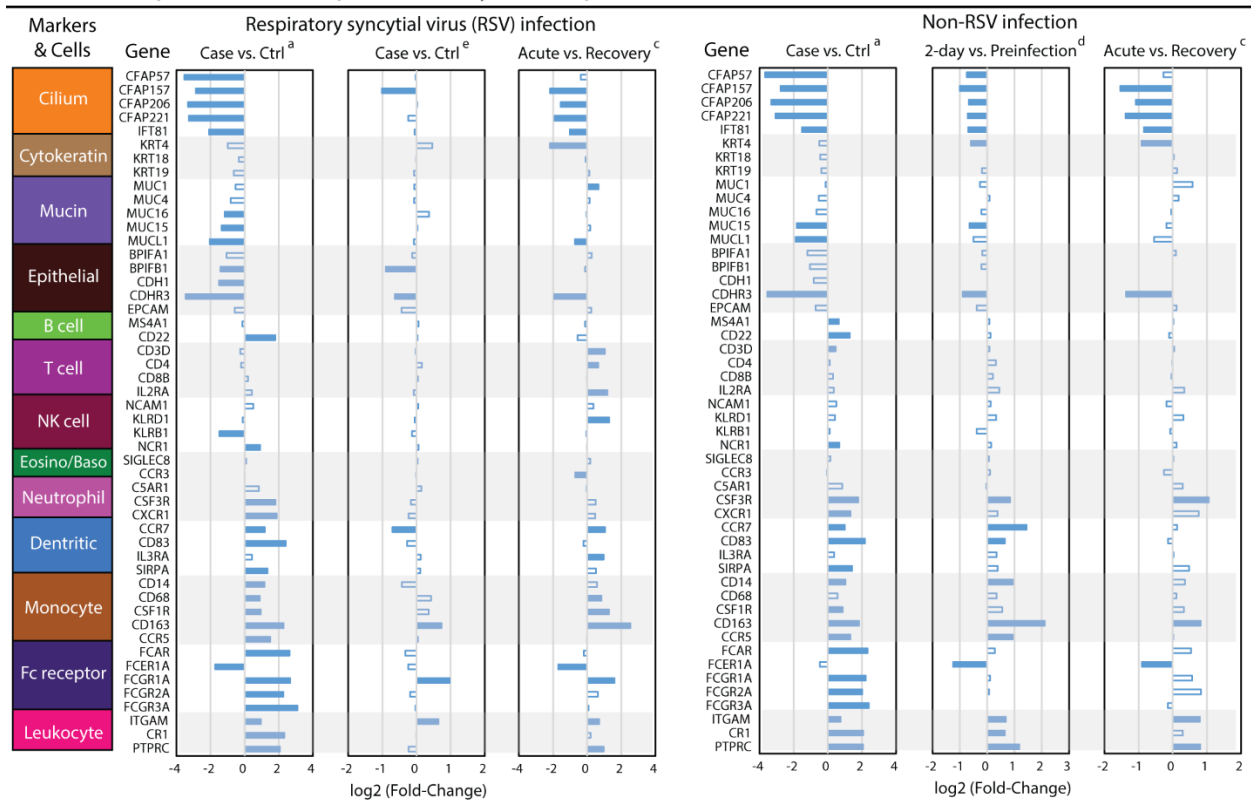

Figure S2. Comparison of cell marker results from the present study with data from four previous studies archived in GEO database: (a) the present study, (b) GSE38900 (Ramilo 2013), (c) GSE97743 (Do 2018), (d) GSE11348 (Proud 2008), and (e) GSE41374 (Ramilo 2016, unpublished). Results are shown separately for RSV and non-RSV subjects. The overall consistent expression patterns of these marker genes are seen across different studies. Panel A shows results for blood samples and Panel B shows results for nasal samples. In A and B, bars indicate log<sub>2</sub> fold-change. Solid bars signify significant fold change ( $\geq 1.5$ ) and  $P < 0.05$ . Open bars indicate non-significant fold change.
