# Supplementary material
Source: PubMed Central journal article supplement (PMC6420164)
Supplement: jiy608_suppl_supplementary_figure_s3.pdf [file jiy608_suppl_supplementary_figure_s3.pdf]

A Number of Differentially Expressed Genes within the 28,476 Genes

| Sample Type | Comparison        | Differentially Expressed Genes at $p < 0.05$ & $FC_{abs} \geq 1.5$ |      |       |           |      |       |
|-------------|-------------------|--------------------------------------------------------------------|------|-------|-----------|------|-------|
|             |                   | Before DSA                                                         |      |       | After DSA |      |       |
|             |                   | Up                                                                 | Down | Total | Up        | Down | Total |
| Nasal       | RSV vs. Ctrl      | 815                                                                | 3989 | 4804  | 1546      | 2780 | 4326  |
| Nasal       | nRSV vs. Ctrl     | 700                                                                | 2108 | 2808  | 904       | 1788 | 2692  |
| Nasal       | asRV vs. Ctrl     | 107                                                                | 1248 | 1355  | 195       | 907  | 1102  |
| Nasal       | RSV vs. nRSV      | 67                                                                 | 501  | 568   | 130       | 341  | 471   |
| Nasal       | nRSV vs. asRV     | 304                                                                | 343  | 647   | 269       | 443  | 712   |
| Nasal       | RSV+nRSV vs. Ctrl | 739                                                                | 2882 | 3621  | 1016      | 2151 | 3167  |
| Nasal       | RSV+nRSV vs. asRV | 334                                                                | 474  | 808   | 344       | 573  | 917   |

B Expression Profiles of 4928 Genes Before DSA Adjustment

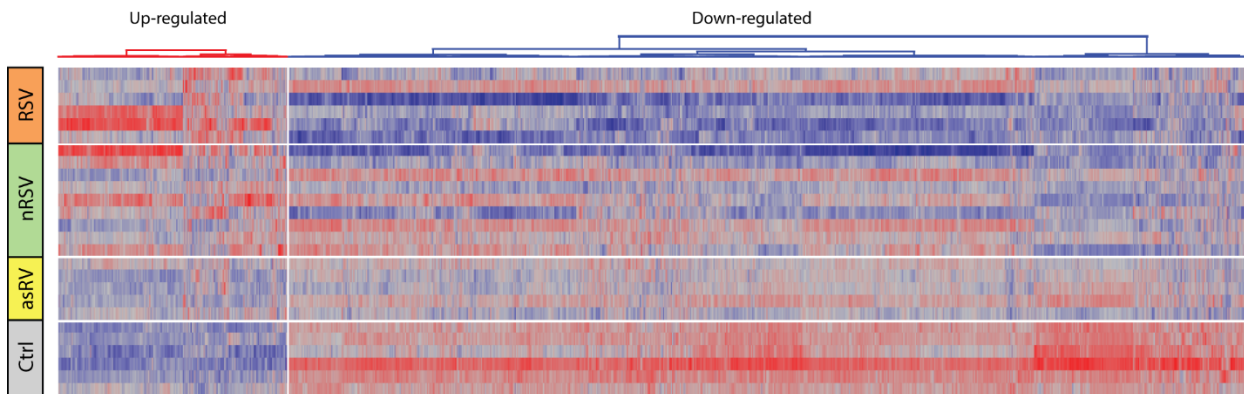

C Expression Profiles of 4928 Genes After DSA Adjustment

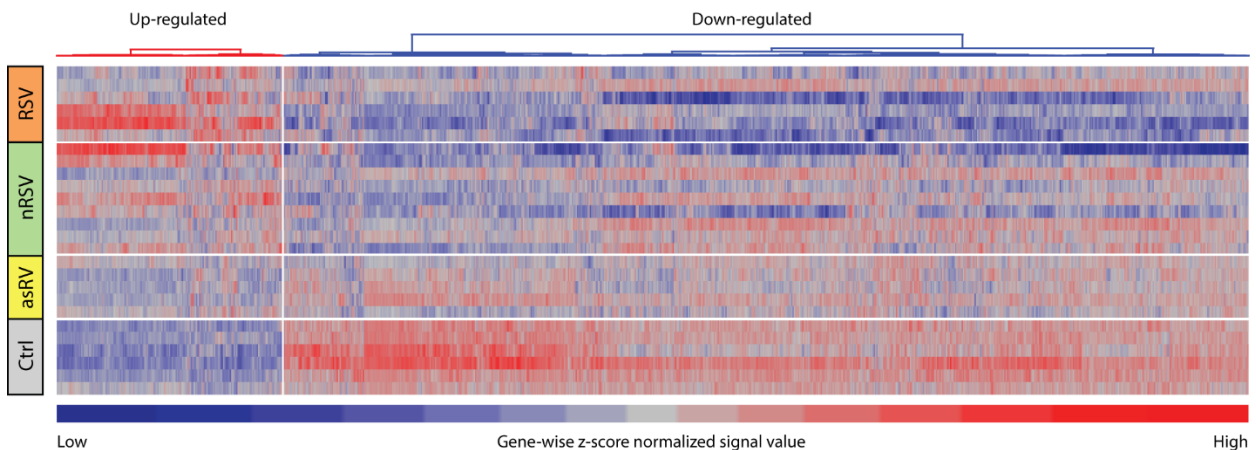

Figure S3. Comparison between pre- and post DSA-adjusted data sets of the number of differentially expressed genes and expression profiles of the union of 4928 genes from 3 between-group comparisons of non-RSV, asRV, and RSV each versus negative control subjects. Upregulated genes were all genes that were upregulated in any of the 2-way comparisons between RSV and Ctrl, non-RSV and Ctrl, and asRV and Ctrl. Downregulated genes were all genes that were downregulated in any of the same comparisons. (A) Number of differentially expressed genes before and after DSA adjustment (counted within the 28476 TCs); (B and C) Expression profiles of the 4928 genes before and after DSA adjustment.
