# Supplementary material
Source: PubMed Central journal article supplement (PMC6420164)
Supplement: jiy608_suppl_supplementary_figure_s4.pdf [file jiy608_suppl_supplementary_figure_s4.pdf]

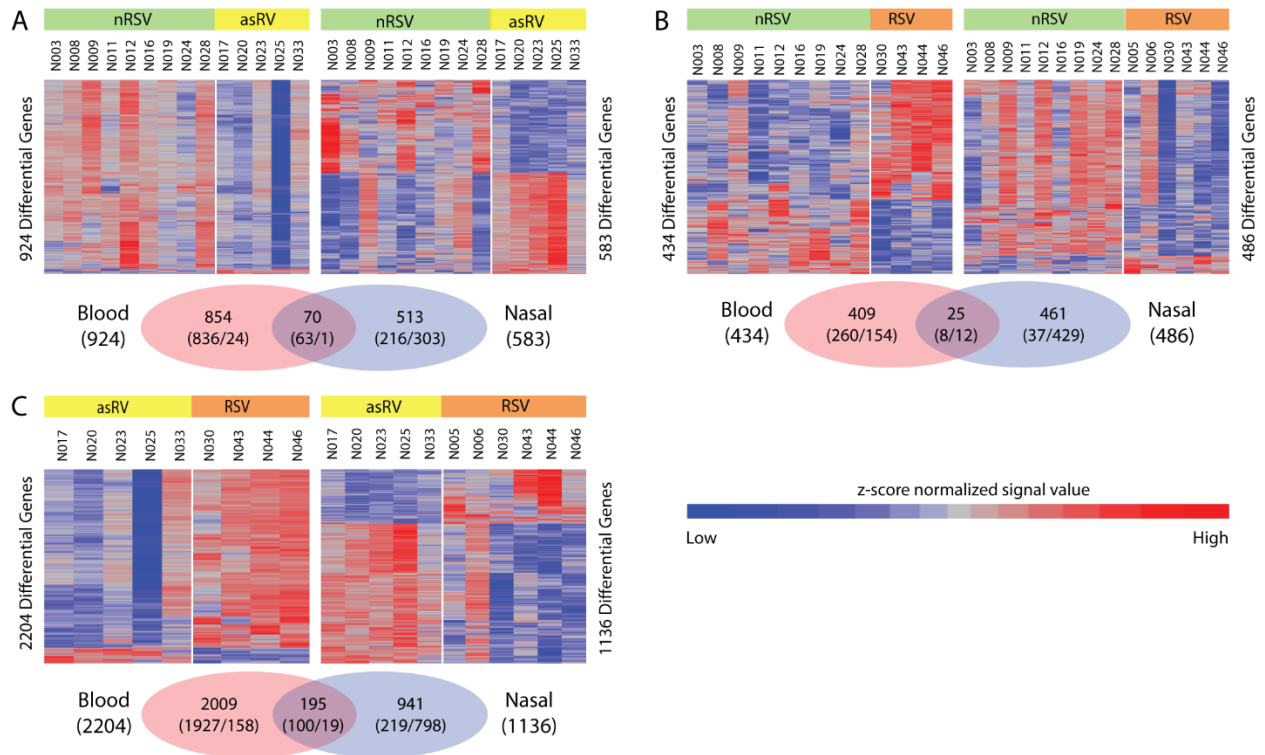

Figure S4. Heatmap and Venn diagrams for 2-way comparisons between each pair of the 3 viral groups in both blood and nasal samples: non-RSV vs. asRV (A), non-RSV vs. RSV (B), and asRV vs. RSV (C). Within the Venn diagram, numbers in parenthesis indicate up/down-regulated genes.
