# Supplementary material
Source: PubMed Central journal article supplement (PMC6420164)
Supplement: jiy608_suppl_supplementary_figure_s6.pdf [file jiy608_suppl_supplementary_figure_s6.pdf]

### A Blood

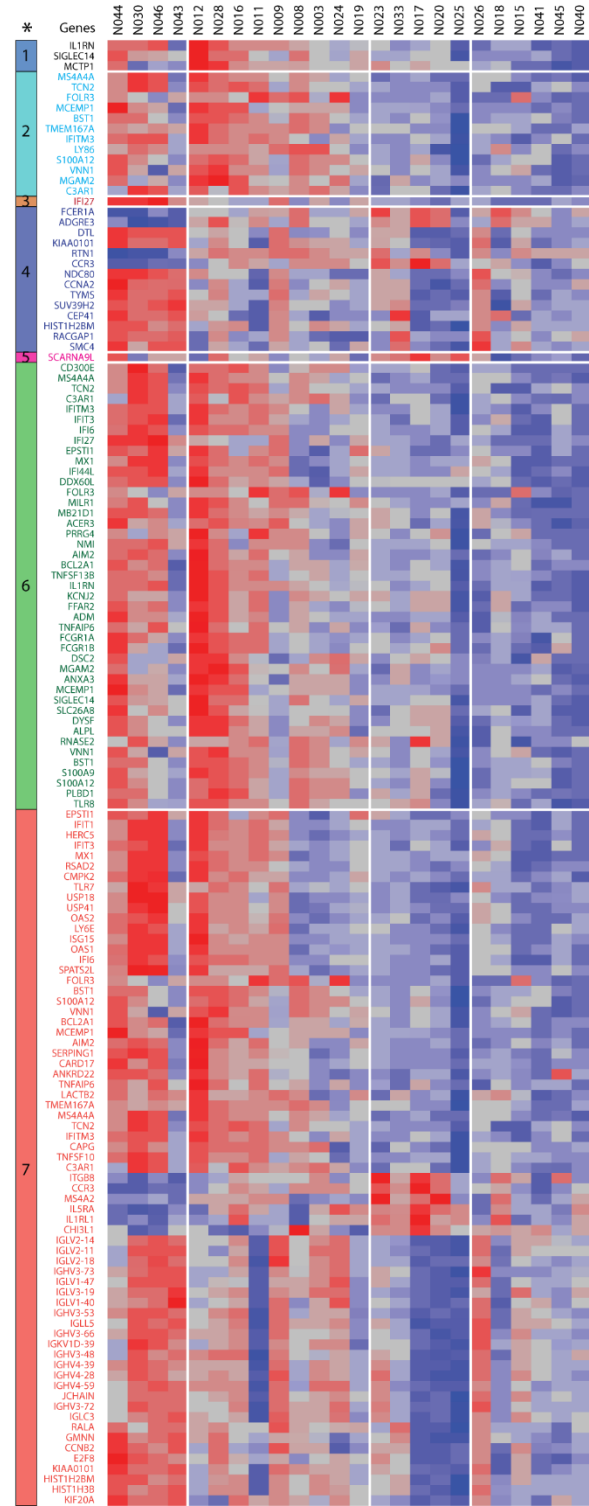

\* Comparison: 1. nRSV vs. Ctrl 5. asRV vs. Ctrl  
 2. nRSV vs. asRV 6. RSV+nRSV vs. Ctrl  
 3. RSV vs. Ctrl 7. RSV+nRSV vs. asRV  
 4. nRSV vs. RSV

### B Nasal

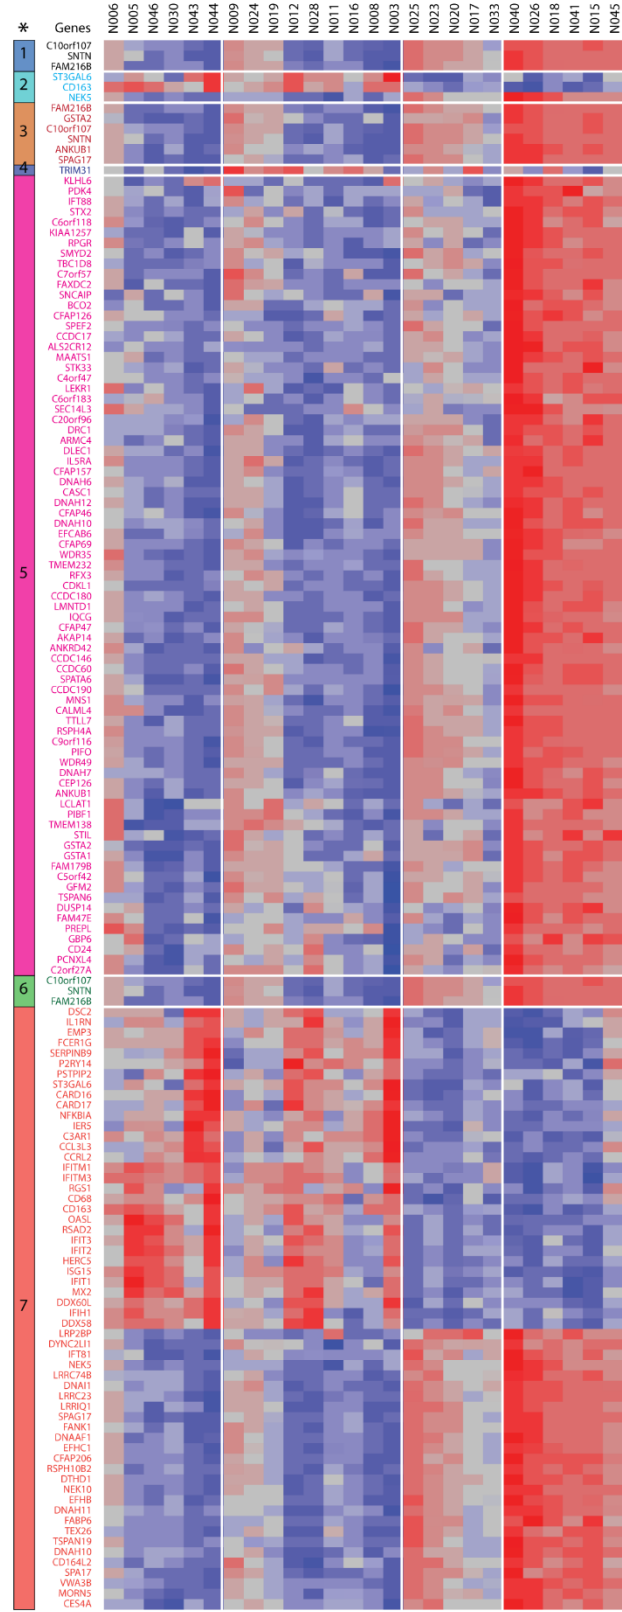

Low  High

gene-wise z-score normalized signal value

Figure S6. Heatmaps displaying the expression of genes comprising the gene-based classification scores in our training data sets: Panel A for blood and Panel B for nasal.
