# Supplementary material
Source: PubMed Central journal article supplement (PMC6420164)
Supplement: jiy608_suppl_supplementary_table_s1.pdf [file jiy608_suppl_supplementary_table_s1.pdf]

**Table S1. Age, gender, season of illness, days of illness at enrollment, and samples obtained**

| PID#                                        | Age (mo.) | Gender | Season | Day of illness at enrollment | Nasal sample | Blood sample |
|---------------------------------------------|-----------|--------|--------|------------------------------|--------------|--------------|
| <b>Symptomatic RSV</b>                      |           |        |        |                              |              |              |
| N005                                        | 4         | M      | Spring | 7                            | Y            | N            |
| N006                                        | 4         | F      | Spring | 3                            | Y            | N            |
| N030                                        | 8         | F      | Fall   | 3                            | Y            | Y            |
| N043                                        | 4         | F      | Winter | 6*                           | Y            | Y            |
| N044                                        | 5         | F      | Winter | 5                            | Y            | Y            |
| N046                                        | 7         | M      | Winter | 5                            | Y            | Y            |
| <b>Symptomatic non-RSV virus (nRSV)</b>     |           |        |        |                              |              |              |
| N003                                        | 6         | M      | Spring | 2                            | Y            | Y            |
| N008                                        | 65        | M      | Spring | 11                           | Y            | Y            |
| N009                                        | 15        | M      | Spring | 2**                          | Y            | Y            |
| N011                                        | 131       | M      | Spring | 2                            | Y            | Y            |
| N012                                        | 19        | F      | Spring | 7                            | Y            | Y            |
| N016                                        | 17        | M      | Summer | 4                            | Y            | Y            |
| N019                                        | 9         | M      | Summer | 3                            | Y            | Y            |
| N024                                        | 11        | M      | Fall   | 2                            | Y            | Y            |
| N028                                        | 14        | F      | Fall   | 1                            | Y            | Y            |
| <b>Asymptomatic Rhinovirus (asRV)</b>       |           |        |        |                              |              |              |
| N017                                        | 112       | F      | Summer |                              | Y            | Y            |
| N020                                        | 107       | F      | Summer |                              | Y            | Y            |
| N023                                        | 29        | M      | Fall   |                              | Y            | Y            |
| N025                                        | 4         | F      | Fall   |                              | Y            | Y            |
| N033                                        | 11        | M      | Fall   |                              | Y            | Y            |
| <b>Virus negative asymptomatic controls</b> |           |        |        |                              |              |              |
| N015                                        | 34        | M      | Summer |                              | Y            | Y            |
| N018                                        | 93        | M      | Summer |                              | Y            | Y            |
| N026                                        | 15        | M      | Fall   |                              | Y            | Y            |
| N040                                        | 9         | M      | Winter |                              | Y            | Y            |
| N041                                        | 17        | M      | Winter |                              | Y            | Y            |
| N045                                        | 26        | M      | Winter |                              | Y            | Y            |

\*16 days of illness, febrile for 6 days

2 days with up to 5 days of additional illness with different symptoms
