# Supplementary material
Source: PubMed Central journal article supplement (PMC6420164)
Supplement: jiy608_suppl_supplementary_table_s2.pdf [file jiy608_suppl_supplementary_table_s2.pdf]

**Table S2. Demographic characteristics of subjects**

| Group                  | RSV              | non-RSV | asRV   | Ctrl   |
|------------------------|------------------|---------|--------|--------|
|                        | Number (Percent) |         |        |        |
| Number of subjects     | 6                | 9       | 5      | 6      |
| Caucasian              | 5 (83)           | 6 (67)  | 3 (60) | 5 (83) |
| Female                 | 4 (67)           | 2 (22)  | 3 (60) | 0      |
| Age in months (median) | 5                | 15      | 29     | 22     |
| Season of enrollment   |                  |         |        |        |
| Winter                 | 3                | 2       | 0      | 3      |
| Spring                 | 2                | 2       | 0      | 0      |
| Summer                 | 0                | 2       | 1      | 2      |
| Fall                   | 1                | 3       | 4      | 1      |

Notes: RSV, respiratory syncytial virus (all were symptomatic); non-RSV, symptomatic virus other than RSV; asRV, asymptomatic rhinovirus; Ctrl, virus-negative asymptomatic controls.
