# Supplementary material
Source: PubMed Central journal article supplement (PMC6420164)
Supplement: jiy608_suppl_supplementary_table_s3.pdf [file jiy608_suppl_supplementary_table_s3.pdf]

**Table S3. Age difference between groups**

| Mann-Whitney U test | p-value   | p-value (corrected for ties) | Bootstrap | Trials w/ Hits | U Statistic |
|---------------------|-----------|------------------------------|-----------|----------------|-------------|
| nRSV vs. RSV        | 0.0015984 | 0.0015984                    | 0         | 0              | 2           |
| RSV vs. Ctrl        | 0.0021645 | 0.0021645                    | 0         | 0              | 0           |
| asRV vs. RSV        | 0.0519481 | 0.0519481                    | 0.035     | 7              | 4.5         |
| nRSV vs. Ctrl       | 0.455944  | 0.455944                     | 0.405     | 81             | 20.5        |
| nRSV vs. asRV       | 0.699301  | 0.699301                     | 0.71      | 142            | 19.5        |
| asRV vs. Ctrl       | 0.792208  | 0.792208                     | 0.645     | 129            | 13          |

| Group | Mean age in month | Median age in month |
|-------|-------------------|---------------------|
| RSV   | 5.3               | 4.5                 |
| nRSV  | 31.9              | 15.0                |
| asRV  | 52.6              | 29.0                |
| Ctrl  | 32.3              | 21.5                |
