# Supplementary material
Source: PubMed Central journal article supplement (PMC6420164)
Supplement: jiy608_suppl_supplementary_table_s4.pdf [file jiy608_suppl_supplementary_table_s4.pdf]

Table S4. Correlation results for top 50 genes with age (month).

| Order | Transcript Cluster ID | Gene Symbol  | Spearman r | p-value  | multiple correction q-value | N  |
|-------|-----------------------|--------------|------------|----------|-----------------------------|----|
| 1     | TC1900009959.hg.1     | ABHD8        | 0.75634    | 0.000008 | 0.123625                    | 26 |
| 2     | TC0300012007.hg.1     | CD200R1      | 0.75394    | 0.000009 | 0.123625                    | 26 |
| 3     | TC1400006507.hg.1     | OR11H5P      | -0.71385   | 0.000042 | 0.361360                    | 26 |
| 4     | TC1600007973.hg.1     | NUP93        | 0.70871    | 0.000051 | 0.361360                    | 26 |
| 5     | TC1600007961.hg.1     | MT1JP        | -0.68369   | 0.000118 | 0.671527                    | 26 |
| 6     | TC2100008173.hg.1     | RPS26P4      | -0.67101   | 0.000175 | 0.759557                    | 26 |
| 7     | TC0600011503.hg.1     | HLA-DOB2     | 0.66895    | 0.000187 | 0.759557                    | 26 |
| 8     | TC2000009149.hg.1     | PTPRT        | 0.64873    | 0.000337 | 0.797262                    | 26 |
| 9     | TC1100007819.hg.1     | MYRF         | 0.64702    | 0.000354 | 0.797262                    | 26 |
| 10    | TC1700007920.hg.1     | AOC4P        | 0.64702    | 0.000354 | 0.797262                    | 26 |
| 11    | TC1000009452.hg.1     | VENTX        | 0.63982    | 0.000432 | 0.797262                    | 26 |
| 12    | TC0100009900.hg.1     | CIART        | 0.63948    | 0.000436 | 0.797262                    | 26 |
| 13    | TC1900006682.hg.1     | EBI3         | 0.63743    | 0.000461 | 0.797262                    | 26 |
| 14    | TC0300007445.hg.1     | GRM2         | 0.63537    | 0.000487 | 0.797262                    | 26 |
| 15    | TC0100013205.hg.1     | ECE1         | -0.63228   | 0.000529 | 0.797262                    | 26 |
| 16    | TC2000008332.hg.1     | LOC101929288 | -0.63228   | 0.000529 | 0.797262                    | 26 |
| 17    | TC1600007957.hg.1     | MT2A         | -0.62646   | 0.000617 | 0.797262                    | 26 |
| 18    | TC1200009872.hg.1     | KLRB1        | 0.62406    | 0.000657 | 0.797262                    | 26 |
| 19    | TC0500013269.hg.1     | FAM153B      | 0.62337    | 0.000669 | 0.797262                    | 26 |
| 20    | TC0600007602.hg.1     | APOM         | 0.61652    | 0.000796 | 0.797262                    | 26 |
| 21    | TC0100017636.hg.1     | RNA5S11      | -0.61549   | 0.000817 | 0.797262                    | 26 |
| 22    | TC0100017637.hg.1     | RNA5S12      | -0.61549   | 0.000817 | 0.797262                    | 26 |
| 23    | TC0100017638.hg.1     | RNA5S13      | -0.61549   | 0.000817 | 0.797262                    | 26 |
| 24    | TC0100017639.hg.1     | RNA5S14      | -0.61549   | 0.000817 | 0.797262                    | 26 |
| 25    | TC0100017640.hg.1     | RNA5S15      | -0.61549   | 0.000817 | 0.797262                    | 26 |
| 26    | TC0100017641.hg.1     | RNA5S16      | -0.61549   | 0.000817 | 0.797262                    | 26 |
| 27    | TC1800006812.hg.1     | LINC01443    | 0.61515    | 0.000824 | 0.797262                    | 26 |
| 28    | TC0400011263.hg.1     | SPARCL1      | 0.61446    | 0.000839 | 0.797262                    | 26 |
| 29    | TC1100011163.hg.1     | MIR7155      | -0.61412   | 0.000846 | 0.797262                    | 26 |
| 30    | TC1200012512.hg.1     | DDX51        | 0.61412    | 0.000846 | 0.797262                    | 26 |
| 31    | TC0100014214.hg.1     | ECHDC2       | 0.61309    | 0.000868 | 0.797262                    | 26 |
| 32    | TC0900008148.hg.1     | TDRD7        | -0.61069   | 0.000921 | 0.819779                    | 26 |
| 33    | TC1600007964.hg.1     | MT1B         | -0.60830   | 0.000977 | 0.843356                    | 26 |
| 34    | TC1600010453.hg.1     | CCDC102A     | 0.60624    | 0.001028 | 0.847549                    | 26 |
| 35    | TC0200015897.hg.1     | MIR4439      | -0.60453   | 0.001071 | 0.847549                    | 26 |
| 36    | TC0500007831.hg.1     | F2R          | 0.60453    | 0.001071 | 0.847549                    | 26 |
| 37    | TC1000009004.hg.1     | PNLIP        | 0.60041    | 0.001183 | 0.887502                    | 26 |
| 38    | TC0700010463.hg.1     | IGF2BP3      | -0.59870   | 0.001232 | 0.887502                    | 26 |
| 39    | TC1500010892.hg.1     | MAN2C1       | 0.59801    | 0.001253 | 0.887502                    | 26 |
| 40    | TC1800007911.hg.1     | MYOM1        | 0.59562    | 0.001326 | 0.887502                    | 26 |
| 41    | TC1900006831.hg.1     | LOC105372257 | -0.59562   | 0.001326 | 0.887502                    | 26 |
| 42    | TC1500009973.hg.1     | ADPGK        | -0.59493   | 0.001347 | 0.887502                    | 26 |
| 43    | TC0X00007131.hg.1     | INE1         | 0.59356    | 0.001391 | 0.887502                    | 26 |
| 44    | TC1900011673.hg.1     | CCDC130      | 0.59356    | 0.001391 | 0.887502                    | 26 |
| 45    | TC2000008682.hg.1     | CST1         | 0.59322    | 0.001403 | 0.887502                    | 26 |
| 46    | TC0200016345.hg.1     | PASK         | 0.59185    | 0.001448 | 0.896406                    | 26 |
| 47    | TC1100009657.hg.1     | IFITM3       | -0.58773   | 0.001592 | 0.922619                    | 26 |
| 48    | TC1100012949.hg.1     | IFITM1       | -0.58705   | 0.001618 | 0.922619                    | 26 |
| 49    | TC0200014772.hg.1     | IFIH1        | -0.58671   | 0.001630 | 0.922619                    | 26 |
| 50    | TC1700009515.hg.1     | MYBBP1A      | 0.58294    | 0.001776 | 0.922619                    | 26 |
