# Supplementary material
Source: PubMed Central journal article supplement (PMC6420164)
Supplement: jiy608_suppl_supplementary_table_s5.pdf [file jiy608_suppl_supplementary_table_s5.pdf]

**Table S5. Parameters for genes used to calculate gene-based classification scores.**

**nRSV vs. Ctrl**

| Specimen | Gene      | Signed loading # | Univariate AUC | Hodges-Lehmann estimate of log2(fold-change) | 2-sided Wilcoxon p-value | Mean   | SD     | PM sPV | PM Ctrl |
|----------|-----------|------------------|----------------|----------------------------------------------|--------------------------|--------|--------|--------|---------|
| Nasal    | C10orf107 | -0.5771          | 1.0000         | -4.7410                                      | 0.0004                   | 7.1010 | 2.5370 | 5.7019 | 9.4382  |
| Nasal    | SNTN      | -0.5776          | 1.0000         | -4.3690                                      | 0.0004                   | 6.2470 | 2.4720 | 4.7034 | 8.5185  |
| Nasal    | FAM216B   | -0.5773          | 1.0000         | -4.2500                                      | 0.0004                   | 7.6000 | 2.5110 | 5.8913 | 9.9020  |
| Blood    | IL1RN     | 0.5789           | 1.0000         | 1.2370                                       | 0.0004                   | 6.5360 | 0.9220 | 6.9725 | 5.7630  |
| Blood    | SIGLEC14  | 0.5744           | 1.0000         | 1.1120                                       | 0.0004                   | 7.7520 | 0.8840 | 8.1165 | 7.1601  |
| Blood    | MCTP1     | 0.5788           | 1.0000         | 1.1070                                       | 0.0004                   | 6.9310 | 0.7830 | 7.2344 | 6.2154  |

**nRSV vs. asRV**

| Specimen | Gene     | Signed loading # | Univariate AUC | Hodges-Lehmann estimate of log2(fold-change) | 2-sided Wilcoxon P-value | Mean    | SD     | PM sPV  | PM asPV |
|----------|----------|------------------|----------------|----------------------------------------------|--------------------------|---------|--------|---------|---------|
| Nasal    | ST3GAL6  | 0.5850           | 1.0000         | 1.3350                                       | 0.0010                   | 5.1240  | 0.9690 | 5.4620  | 4.2087  |
| Nasal    | CD163    | 0.6120           | 1.0000         | 1.1910                                       | 0.0010                   | 7.8840  | 0.7840 | 8.3305  | 7.1241  |
| Nasal    | NEK5     | -0.5322          | 1.0000         | -1.0750                                      | 0.0010                   | 5.6180  | 0.7620 | 5.2444  | 6.3217  |
| Blood    | MS4A4A   | 0.2978           | 1.0000         | 1.2350                                       | 0.0010                   | 5.4310  | 0.9010 | 5.8486  | 4.5898  |
| Blood    | TCN2     | 0.3078           | 0.9780         | 1.0720                                       | 0.0020                   | 6.8020  | 0.7370 | 7.1750  | 6.1781  |
| Blood    | FOLR3    | 0.2222           | 0.9560         | 1.4760                                       | 0.0040                   | 8.5100  | 1.0030 | 9.0494  | 7.6400  |
| Blood    | MCEMP1   | 0.2889           | 0.9330         | 1.2570                                       | 0.0070                   | 8.0180  | 1.2320 | 8.3448  | 7.1217  |
| Blood    | BST1     | 0.3171           | 0.9330         | 1.1080                                       | 0.0070                   | 9.4600  | 0.9710 | 9.9189  | 8.9482  |
| Blood    | TMEM167A | 0.2965           | 0.9330         | 1.0670                                       | 0.0070                   | 8.3740  | 1.0140 | 8.8599  | 7.7670  |
| Blood    | IFITM3   | 0.2970           | 0.9330         | 1.0630                                       | 0.0070                   | 11.2390 | 0.9160 | 11.6568 | 10.6414 |
| Blood    | LY86     | 0.2803           | 0.9330         | 1.0260                                       | 0.0070                   | 9.2100  | 0.7450 | 9.6418  | 8.4995  |
| Blood    | S100A12  | 0.3009           | 0.9110         | 1.6410                                       | 0.0120                   | 10.7300 | 1.3410 | 11.4969 | 9.8336  |
| Blood    | VNN1     | 0.3006           | 0.9110         | 1.4730                                       | 0.0120                   | 7.4100  | 1.1700 | 7.9477  | 6.6813  |
| Blood    | MGAM2    | 0.2507           | 0.9110         | 1.2600                                       | 0.0120                   | 7.1030  | 1.1370 | 7.5166  | 6.1771  |
| Blood    | C3AR1    | 0.2911           | 0.9110         | 1.2600                                       | 0.0120                   | 7.9280  | 0.9120 | 8.4278  | 7.0394  |

**RSV vs. Ctrl**

| Specimen | Gene      | Signed loading # | Univariate AUC | Hodges-Lehmann estimate of log2(fold-change) | 2-sided Wilcoxon p-value | Mean   | SD     | PM RSV | PM Ctrl |
|----------|-----------|------------------|----------------|----------------------------------------------|--------------------------|--------|--------|--------|---------|
| Nasal    | FAM216B   | -0.4059          | 1.0000         | -4.6310                                      | 0.0022                   | 7.8160 | 2.4910 | 5.4079 | 9.9020  |
| Nasal    | GSTA2     | -0.4062          | 1.0000         | -4.4950                                      | 0.0022                   | 6.2110 | 2.3730 | 3.8213 | 8.3739  |
| Nasal    | C10orf107 | -0.4084          | 1.0000         | -4.4480                                      | 0.0022                   | 7.3280 | 2.5360 | 5.0361 | 9.4382  |
| Nasal    | SNTN      | -0.4078          | 1.0000         | -4.4070                                      | 0.0022                   | 6.6350 | 2.4240 | 4.6418 | 8.5185  |
| Nasal    | ANKUB1    | -0.4096          | 1.0000         | -4.1930                                      | 0.0022                   | 6.8340 | 2.2660 | 4.6972 | 8.7630  |
| Nasal    | SPAG17    | -0.4116          | 1.0000         | -4.1000                                      | 0.0022                   | 4.8780 | 2.2520 | 2.7872 | 6.8998  |
| Blood    | IFI27     | 1.0000           | 1.0000         | 3.4660                                       | 0.0095                   | 7.7060 | 1.7880 | 9.8473 | 6.4400  |

**nRSV vs. RSV**

| Specimen | Gene   | Signed loading # | Univariate AUC | Hodges-Lehmann estimate of log2(fold-change) | 2-sided Wilcoxon p-value | Mean   | SD     | PM sPV | PM RSV |
|----------|--------|------------------|----------------|----------------------------------------------|--------------------------|--------|--------|--------|--------|
| Nasal    | TRIM31 | 1.0000           | 0.9260         | 2.2840                                       | 0.0048                   | 5.6380 | 1.5870 | 6.6433 | 4.2814 |
| Blood    | FCER1A | 0.2447           | 1.0000         | 1.7810                                       | 0.0028                   | 6.0940 | 0.9720 | 6.6043 | 4.9113 |
| Blood    | ADGRE3 | 0.2255           | 1.0000         | 1.7300                                       | 0.0028                   | 8.4280 | 0.9670 | 8.9289 | 7.2625 |

| Specimen | Gene      | Signed loading # | Univariate AUC | Hodges-Lehmann estimate of log2(fold-change) | 2-sided Wilcoxon p-value | Mean    | SD     | PM sPV  | PM RSV  |
|----------|-----------|------------------|----------------|----------------------------------------------|--------------------------|---------|--------|---------|---------|
| Blood    | DTL       | -0.2916          | 1.0000         | -1.5760                                      | 0.0028                   | 6.2310  | 0.8440 | 5.7156  | 7.1496  |
| Blood    | KIAA0101  | -0.2645          | 1.0000         | -1.5360                                      | 0.0028                   | 6.4790  | 1.1010 | 6.0879  | 7.5612  |
| Blood    | RTN1      | 0.2566           | 1.0000         | 1.4840                                       | 0.0028                   | 7.4900  | 0.7230 | 7.9219  | 6.4573  |
| Blood    | CCR3      | 0.2658           | 1.0000         | 1.3220                                       | 0.0028                   | 4.6680  | 0.7140 | 5.0802  | 3.7836  |
| Blood    | NDC80     | -0.2822          | 1.0000         | -1.2950                                      | 0.0028                   | 4.0980  | 0.7770 | 3.7121  | 5.0164  |
| Blood    | CCNA2     | -0.2830          | 1.0000         | -1.2320                                      | 0.0028                   | 6.8170  | 0.7580 | 6.4263  | 7.5080  |
| Blood    | TYMS      | -0.2887          | 1.0000         | -1.1850                                      | 0.0028                   | 6.5060  | 0.6610 | 6.0541  | 7.2302  |
| Blood    | SUV39H2   | -0.2815          | 1.0000         | -1.1170                                      | 0.0028                   | 5.1030  | 0.6750 | 4.7500  | 5.9530  |
| Blood    | CEP41     | -0.2710          | 1.0000         | -1.0820                                      | 0.0028                   | 3.9690  | 0.6500 | 3.6276  | 4.6639  |
| Blood    | HIST1H2BM | -0.2579          | 1.0000         | -1.0460                                      | 0.0028                   | 10.9170 | 0.8490 | 10.6372 | 11.8106 |
| Blood    | RACGAP1   | -0.2583          | 1.0000         | -1.0380                                      | 0.0028                   | 6.4340  | 0.5990 | 6.1211  | 7.0893  |
| Blood    | SMC4      | -0.2622          | 1.0000         | -1.0130                                      | 0.0028                   | 7.8470  | 0.5990 | 7.5209  | 8.5822  |

**asRV vs. Ctrl**

| Specimene | Gene     | Signed loading # | Univariate AUC | Hodges-Lehmann estimate of log2(fold-change) | 2-sided Wilcoxon p-value | Mean   | SD     | PM asPV | PM Ctrl |
|-----------|----------|------------------|----------------|----------------------------------------------|--------------------------|--------|--------|---------|---------|
| Nasal     | ANKUB1   | -0.1171          | 1.0000         | -2.1070                                      | 0.0043                   | 7.8760 | 1.2950 | 6.7553  | 8.7630  |
| Nasal     | DNAH6    | -0.1192          | 1.0000         | -2.0310                                      | 0.0043                   | 7.3220 | 1.1900 | 6.2635  | 8.2054  |
| Nasal     | DNAH12   | -0.1162          | 1.0000         | -2.0310                                      | 0.0043                   | 7.8040 | 1.3490 | 6.6988  | 8.6531  |
| Nasal     | CFAP47   | -0.1179          | 1.0000         | -1.8960                                      | 0.0043                   | 5.5670 | 1.2250 | 4.6382  | 6.3767  |
| Nasal     | C6orf118 | -0.1145          | 1.0000         | -1.8810                                      | 0.0043                   | 4.9190 | 1.2530 | 3.8663  | 5.7476  |
| Nasal     | LMNTD1   | -0.1175          | 1.0000         | -1.8470                                      | 0.0043                   | 5.7490 | 1.2240 | 4.6848  | 6.4579  |
| Nasal     | AKAP14   | -0.1162          | 1.0000         | -1.8380                                      | 0.0043                   | 5.1630 | 1.1180 | 4.1278  | 5.8769  |
| Nasal     | GSTA2    | -0.1068          | 1.0000         | -1.8230                                      | 0.0043                   | 7.4710 | 1.3080 | 6.6344  | 8.3739  |
| Nasal     | MAATS1   | -0.1187          | 1.0000         | -1.8050                                      | 0.0043                   | 3.6270 | 1.2340 | 2.5376  | 4.4240  |
| Nasal     | IFT88    | -0.1149          | 1.0000         | -1.7450                                      | 0.0043                   | 4.3280 | 1.0730 | 3.5002  | 5.1413  |
| Nasal     | CFAP157  | -0.1080          | 1.0000         | -1.7260                                      | 0.0043                   | 8.4850 | 1.0920 | 7.6419  | 9.2887  |
| Nasal     | DNAH7    | -0.1177          | 1.0000         | -1.7010                                      | 0.0043                   | 6.4230 | 1.1820 | 5.3974  | 7.0504  |
| Nasal     | CDKL1    | -0.1193          | 1.0000         | -1.6820                                      | 0.0043                   | 7.7930 | 1.1670 | 6.8463  | 8.4583  |
| Nasal     | RSPH4A   | -0.1177          | 1.0000         | -1.6560                                      | 0.0043                   | 8.9110 | 1.1110 | 8.0666  | 9.5583  |
| Nasal     | CASC1    | -0.1168          | 1.0000         | -1.6550                                      | 0.0043                   | 6.4970 | 1.0530 | 5.6890  | 7.1640  |
| Nasal     | STK33    | -0.1066          | 1.0000         | -1.6160                                      | 0.0043                   | 4.4300 | 1.1550 | 3.3908  | 5.2425  |
| Nasal     | DNAH10   | -0.1176          | 1.0000         | -1.5840                                      | 0.0043                   | 6.6030 | 0.9430 | 5.8872  | 7.2034  |
| Nasal     | TMEM232  | -0.1180          | 1.0000         | -1.5620                                      | 0.0043                   | 5.9580 | 1.1110 | 4.8932  | 6.5867  |
| Nasal     | PIFO     | -0.1165          | 1.0000         | -1.5090                                      | 0.0043                   | 8.7800 | 1.1450 | 7.8501  | 9.4022  |
| Nasal     | RPGR     | -0.1135          | 1.0000         | -1.4920                                      | 0.0043                   | 6.0740 | 0.9670 | 5.1825  | 6.6821  |
| Nasal     | ALS2CR12 | -0.1173          | 1.0000         | -1.4440                                      | 0.0043                   | 5.3270 | 1.0060 | 4.4532  | 5.9366  |
| Nasal     | LEKR1    | -0.1095          | 1.0000         | -1.4170                                      | 0.0043                   | 4.7590 | 0.8400 | 3.9940  | 5.3535  |
| Nasal     | SPATA6   | -0.1192          | 1.0000         | -1.3890                                      | 0.0043                   | 7.4150 | 0.8900 | 6.6340  | 7.9468  |
| Nasal     | TTLL7    | -0.1173          | 1.0000         | -1.3770                                      | 0.0043                   | 6.2470 | 1.0060 | 5.4964  | 6.7164  |
| Nasal     | WDR49    | -0.1169          | 1.0000         | -1.3730                                      | 0.0043                   | 7.2220 | 1.0250 | 6.4047  | 7.8078  |
| Nasal     | CEP126   | -0.1183          | 1.0000         | -1.3620                                      | 0.0043                   | 6.0210 | 0.9960 | 5.1143  | 6.5392  |
| Nasal     | CCDC146  | -0.1165          | 1.0000         | -1.3460                                      | 0.0043                   | 7.8720 | 0.9050 | 7.0012  | 8.5423  |
| Nasal     | MNS1     | -0.1173          | 1.0000         | -1.3450                                      | 0.0043                   | 6.4810 | 1.0370 | 5.6576  | 7.1015  |
| Nasal     | PDK4     | -0.1097          | 1.0000         | -1.3430                                      | 0.0043                   | 4.7840 | 0.8290 | 4.0220  | 5.4198  |
| Nasal     | CFAP46   | -0.1128          | 1.0000         | -1.3370                                      | 0.0043                   | 6.5100 | 0.7870 | 5.8231  | 6.9662  |
| Nasal     | FAM179B  | -0.1167          | 1.0000         | -1.3310                                      | 0.0043                   | 7.1390 | 0.8360 | 6.4318  | 7.7345  |
| Nasal     | IQCG     | -0.1180          | 1.0000         | -1.3260                                      | 0.0043                   | 7.1760 | 0.9720 | 6.3323  | 7.6696  |
| Nasal     | CCDC60   | -0.1195          | 1.0000         | -1.3250                                      | 0.0043                   | 6.3100 | 0.8390 | 5.5354  | 6.8545  |
| Nasal     | DLEC1    | -0.1151          | 1.0000         | -1.3110                                      | 0.0043                   | 7.2390 | 0.7880 | 6.5461  | 7.8221  |
| Nasal     | CD24     | -0.1112          | 1.0000         | -1.3050                                      | 0.0043                   | 8.6830 | 0.9100 | 7.8959  | 9.2018  |
| Nasal     | C5orf42  | -0.1152          | 1.0000         | -1.3020                                      | 0.0043                   | 7.5730 | 0.8230 | 6.8787  | 8.1806  |
| Nasal     | C9orf116 | -0.1163          | 1.0000         | -1.3010                                      | 0.0043                   | 9.2250 | 0.9220 | 8.4424  | 9.7504  |
| Nasal     | GSTA1    | -0.1042          | 1.0000         | -1.2950                                      | 0.0043                   | 7.9390 | 1.1480 | 7.4035  | 8.7348  |

| Specimene | Gene     | Signed loading # | Univariate AUC | Hodges-Lehmann estimate of log2(fold-change) | 2-sided Wilcoxon p-value | Mean   | SD     | PM asPV | PM Ctrl |
|-----------|----------|------------------|----------------|----------------------------------------------|--------------------------|--------|--------|---------|---------|
| Nasal     | IL5RA    | -0.1148          | 1.0000         | -1.2930                                      | 0.0043                   | 8.3660 | 0.8290 | 7.6686  | 8.9888  |
| Nasal     | WDR35    | -0.1197          | 1.0000         | -1.2860                                      | 0.0043                   | 5.7840 | 0.9750 | 5.0422  | 6.3690  |
| Nasal     | CCDC17   | -0.1177          | 1.0000         | -1.2840                                      | 0.0043                   | 8.5560 | 0.8460 | 7.8486  | 9.0326  |
| Nasal     | FAM47E   | -0.1155          | 1.0000         | -1.2750                                      | 0.0043                   | 3.8650 | 0.8720 | 3.1257  | 4.3456  |
| Nasal     | CFAP126  | -0.1121          | 1.0000         | -1.2630                                      | 0.0043                   | 5.8520 | 0.7590 | 5.1618  | 6.3971  |
| Nasal     | STIL     | -0.0925          | 1.0000         | -1.2580                                      | 0.0043                   | 5.1500 | 0.7990 | 4.4534  | 5.6566  |
| Nasal     | DRC1     | -0.1102          | 1.0000         | -1.2560                                      | 0.0043                   | 5.7060 | 1.0100 | 5.0693  | 6.3305  |
| Nasal     | ARMC4    | -0.1106          | 1.0000         | -1.2420                                      | 0.0043                   | 5.1520 | 0.9040 | 4.5816  | 5.7399  |
| Nasal     | SEC14L3  | -0.1126          | 1.0000         | -1.2300                                      | 0.0043                   | 4.8480 | 0.9300 | 4.0049  | 5.5855  |
| Nasal     | RFX3     | -0.1178          | 1.0000         | -1.2260                                      | 0.0043                   | 6.7380 | 0.9030 | 5.9361  | 7.3682  |
| Nasal     | EFCAB6   | -0.1171          | 1.0000         | -1.2240                                      | 0.0043                   | 6.5230 | 0.7520 | 5.9166  | 6.9925  |
| Nasal     | KLHL6    | -0.1157          | 1.0000         | -1.2170                                      | 0.0043                   | 6.7350 | 0.7670 | 6.0634  | 7.2527  |
| Nasal     | PCNXL4   | -0.1160          | 1.0000         | -1.2080                                      | 0.0043                   | 6.5490 | 0.7640 | 5.9029  | 6.9699  |
| Nasal     | TSPAN6   | -0.1101          | 1.0000         | -1.2080                                      | 0.0043                   | 9.4370 | 0.8380 | 8.8325  | 10.0402 |
| Nasal     | C7orf57  | -0.1170          | 1.0000         | -1.2060                                      | 0.0043                   | 5.2950 | 0.8290 | 4.6525  | 5.7123  |
| Nasal     | FAXDC2   | -0.1095          | 1.0000         | -1.2000                                      | 0.0043                   | 5.7470 | 0.7900 | 5.0513  | 6.3471  |
| Nasal     | C20orf96 | -0.1117          | 1.0000         | -1.1870                                      | 0.0043                   | 6.0660 | 0.7620 | 5.4137  | 6.5999  |
| Nasal     | CFAP69   | -0.1137          | 1.0000         | -1.1870                                      | 0.0043                   | 4.9940 | 0.9860 | 4.3499  | 5.5482  |
| Nasal     | TBC1D8   | -0.1130          | 1.0000         | -1.1830                                      | 0.0043                   | 7.7240 | 0.8570 | 7.0564  | 8.1643  |
| Nasal     | KIAA1257 | -0.1176          | 1.0000         | -1.1580                                      | 0.0043                   | 6.0920 | 0.9170 | 5.4217  | 6.6265  |
| Nasal     | SNCAIP   | -0.1093          | 1.0000         | -1.1560                                      | 0.0043                   | 4.5830 | 0.7070 | 3.9747  | 5.0814  |
| Nasal     | TMEM138  | -0.1166          | 1.0000         | -1.1480                                      | 0.0043                   | 7.5320 | 0.7640 | 6.8732  | 8.0548  |
| Nasal     | GFM2     | -0.1154          | 1.0000         | -1.1460                                      | 0.0043                   | 7.4840 | 0.7880 | 6.8559  | 7.9420  |
| Nasal     | STX2     | -0.1160          | 1.0000         | -1.1460                                      | 0.0043                   | 6.3480 | 0.6920 | 5.6582  | 6.8464  |
| Nasal     | SPEF2    | -0.1176          | 1.0000         | -1.1370                                      | 0.0043                   | 6.4590 | 1.0310 | 5.6548  | 6.9137  |
| Nasal     | C4orf47  | -0.1127          | 1.0000         | -1.1310                                      | 0.0043                   | 5.8210 | 0.8040 | 5.0960  | 6.2713  |
| Nasal     | CCDC190  | -0.1170          | 1.0000         | -1.1150                                      | 0.0043                   | 8.3290 | 0.9000 | 7.6782  | 8.8109  |
| Nasal     | CCDC180  | -0.1180          | 1.0000         | -1.1140                                      | 0.0043                   | 6.8640 | 0.7610 | 6.2142  | 7.3416  |
| Nasal     | GBP6     | -0.0983          | 1.0000         | -1.1140                                      | 0.0043                   | 5.2970 | 0.6490 | 4.7096  | 5.7963  |
| Nasal     | C6orf183 | -0.1049          | 1.0000         | -1.1010                                      | 0.0043                   | 4.7770 | 0.7840 | 4.1756  | 5.2159  |
| Nasal     | PREPL    | -0.1087          | 1.0000         | -1.0800                                      | 0.0043                   | 5.9540 | 0.6590 | 5.3680  | 6.4008  |
| Nasal     | ANKRD42  | -0.1146          | 1.0000         | -1.0730                                      | 0.0043                   | 4.8420 | 0.7440 | 4.2306  | 5.2422  |
| Nasal     | PIBF1    | -0.1101          | 1.0000         | -1.0700                                      | 0.0043                   | 5.7730 | 0.7260 | 5.1912  | 6.1480  |
| Nasal     | BCO2     | -0.1124          | 1.0000         | -1.0640                                      | 0.0043                   | 4.1810 | 0.8430 | 3.5128  | 4.5503  |
| Nasal     | CALML4   | -0.1154          | 1.0000         | -1.0550                                      | 0.0043                   | 8.7160 | 0.7340 | 8.1334  | 9.0611  |
| Nasal     | LCLAT1   | -0.0998          | 1.0000         | -1.0280                                      | 0.0043                   | 6.7640 | 0.6130 | 6.2255  | 7.1609  |
| Nasal     | C2orf27A | -0.1072          | 1.0000         | -1.0190                                      | 0.0043                   | 5.6240 | 0.8120 | 4.9615  | 6.0496  |
| Nasal     | DUSP14   | -0.1126          | 1.0000         | -1.0090                                      | 0.0043                   | 6.4380 | 0.6200 | 5.8573  | 6.9231  |
| Nasal     | SMYD2    | -0.1137          | 1.0000         | -1.0040                                      | 0.0043                   | 6.3350 | 0.7890 | 5.7457  | 6.6656  |
| Blood     | SCARNA9L | 1.0000           | 1.0000         | 1.1540                                       | 0.0043                   | 3.7270 | 0.7150 | 4.3952  | 3.1861  |

**RSV+nRSV vs. Ctrl**

| Specimen | Gene      | Signed loading # | Univariate AUC | Hodges-Lehmann estimate of log2(fold-change) | 2-sided Wilcoxon p-value | Mean    | SD     | PM RSV+sPV | PM Ctrl |
|----------|-----------|------------------|----------------|----------------------------------------------|--------------------------|---------|--------|------------|---------|
| Nasal    | C10orf107 | -0.5798          | 1.0000         | -4.6150                                      | 0.0005                   | 6.5380  | 2.4280 | 5.2738     | 9.4382  |
| Nasal    | SNTN      | -0.5777          | 1.0000         | -4.3690                                      | 0.0005                   | 5.7740  | 2.3420 | 4.6446     | 8.5185  |
| Nasal    | FAM216B   | -0.5746          | 1.0000         | -4.3330                                      | 0.0005                   | 7.0310  | 2.3750 | 5.6980     | 9.9020  |
| Blood    | SIGLEC14  | 0.1658           | 1.0000         | 1.0450                                       | 0.0001                   | 7.8430  | 0.8300 | 8.1277     | 7.1601  |
| Blood    | IL1RN     | 0.1727           | 0.9620         | 1.2660                                       | 0.0005                   | 6.6410  | 0.9140 | 7.0260     | 5.7630  |
| Blood    | S100A9    | 0.1654           | 0.9620         | 1.1960                                       | 0.0005                   | 10.2100 | 0.8160 | 10.5522    | 9.3809  |
| Blood    | MGAM2     | 0.1537           | 0.9490         | 1.2850                                       | 0.0009                   | 6.9180  | 1.1130 | 7.3117     | 5.9340  |
| Blood    | PLBD1     | 0.1605           | 0.9360         | 1.3690                                       | 0.0014                   | 8.4140  | 0.8480 | 8.8272     | 7.5736  |
| Blood    | MILR1     | 0.1545           | 0.9360         | 1.1100                                       | 0.0014                   | 7.6760  | 0.6670 | 8.0013     | 6.9471  |
| Blood    | ADM       | 0.1693           | 0.9360         | 1.0390                                       | 0.0014                   | 7.1880  | 0.9680 | 7.4675     | 6.2597  |

| Specimen | Gene     | Signed loading # | Univariate AUC | Hodges-Lehmann estimate of log2(fold-change) | 2-sided Wilcoxon p-value | Mean    | SD     | PM RSV+sPV | PM Ctrl |
|----------|----------|------------------|----------------|----------------------------------------------|--------------------------|---------|--------|------------|---------|
| Blood    | SLC26A8  | 0.1638           | 0.9230         | 1.4230                                       | 0.0022                   | 4.5300  | 1.2120 | 4.7257     | 3.5132  |
| Blood    | TNFAIP6  | 0.1558           | 0.9230         | 1.2690                                       | 0.0022                   | 7.7280  | 1.1080 | 8.0625     | 6.8682  |
| Blood    | IFI27    | 0.0953           | 0.9230         | 1.2600                                       | 0.0022                   | 7.5190  | 1.3540 | 7.8308     | 6.4400  |
| Blood    | IFITM3   | 0.1609           | 0.9230         | 1.1680                                       | 0.0022                   | 11.4030 | 0.8480 | 11.8027    | 10.5699 |
| Blood    | TNFSF13B | 0.1759           | 0.9230         | 1.1300                                       | 0.0022                   | 8.8340  | 0.8710 | 9.1803     | 8.0977  |
| Blood    | C3AR1    | 0.1216           | 0.9230         | 1.0750                                       | 0.0022                   | 8.0930  | 0.7610 | 8.4278     | 7.3513  |
| Blood    | ALPL     | 0.1585           | 0.9100         | 1.5690                                       | 0.0032                   | 8.9240  | 1.2280 | 9.3710     | 7.7962  |
| Blood    | MCEMP1   | 0.1630           | 0.9100         | 1.4110                                       | 0.0032                   | 8.0310  | 1.3280 | 8.4945     | 6.8818  |
| Blood    | TCN2     | 0.1475           | 0.9100         | 1.1550                                       | 0.0032                   | 6.8920  | 0.8460 | 7.2515     | 6.0877  |
| Blood    | MB21D1   | 0.1659           | 0.9100         | 1.1320                                       | 0.0032                   | 6.0720  | 0.8200 | 6.4438     | 5.2292  |
| Blood    | TLR8     | 0.1610           | 0.9100         | 1.1130                                       | 0.0032                   | 8.0240  | 0.8000 | 8.4016     | 7.2058  |
| Blood    | BST1     | 0.1615           | 0.9100         | 1.0690                                       | 0.0032                   | 9.5550  | 0.7030 | 9.8542     | 8.8799  |
| Blood    | FCGR1A   | 0.1665           | 0.8970         | 1.5500                                       | 0.0047                   | 7.4810  | 1.2380 | 7.9676     | 6.3984  |
| Blood    | S100A12  | 0.1463           | 0.8970         | 1.4230                                       | 0.0047                   | 10.7670 | 1.0570 | 11.2749    | 9.8346  |
| Blood    | FFAR2    | 0.1711           | 0.8970         | 1.2190                                       | 0.0047                   | 8.4020  | 1.0270 | 8.7696     | 7.4407  |
| Blood    | RNASE2   | 0.1045           | 0.8970         | 1.1540                                       | 0.0047                   | 8.6450  | 0.8080 | 9.0098     | 7.8427  |
| Blood    | ACER3    | 0.1467           | 0.8970         | 1.0710                                       | 0.0047                   | 5.5480  | 0.8090 | 5.8979     | 4.8352  |
| Blood    | PRRG4    | 0.1284           | 0.8970         | 1.0250                                       | 0.0047                   | 7.7310  | 0.7550 | 7.9914     | 7.1177  |
| Blood    | IFI6     | 0.1499           | 0.8850         | 1.5030                                       | 0.0066                   | 8.8310  | 1.2150 | 9.3202     | 7.7989  |
| Blood    | DSC2     | 0.1259           | 0.8850         | 1.2330                                       | 0.0066                   | 6.2600  | 1.1120 | 6.6816     | 5.2878  |
| Blood    | AIM2     | 0.1605           | 0.8850         | 1.2110                                       | 0.0066                   | 7.0340  | 1.1110 | 7.4436     | 6.1391  |
| Blood    | ANXA3    | 0.1606           | 0.8850         | 1.2000                                       | 0.0066                   | 6.5730  | 1.1950 | 6.8826     | 5.6714  |
| Blood    | DYSF     | 0.1661           | 0.8850         | 1.0840                                       | 0.0066                   | 8.4050  | 0.9810 | 8.7407     | 7.6223  |
| Blood    | IFI44L   | 0.1435           | 0.8720         | 2.5250                                       | 0.0092                   | 7.1260  | 1.9500 | 7.9955     | 5.4310  |
| Blood    | MX1      | 0.1479           | 0.8720         | 1.6840                                       | 0.0092                   | 9.3710  | 1.2400 | 9.9044     | 8.3728  |
| Blood    | VNN1     | 0.1265           | 0.8720         | 1.5040                                       | 0.0092                   | 7.2660  | 1.2470 | 7.7483     | 6.1836  |
| Blood    | MS4A4A   | 0.1661           | 0.8720         | 1.3020                                       | 0.0092                   | 5.5780  | 0.9770 | 6.0132     | 4.6806  |
| Blood    | KCNJ2    | 0.1622           | 0.8720         | 1.2630                                       | 0.0092                   | 7.0190  | 0.9440 | 7.3897     | 6.0506  |
| Blood    | FCGR1B   | 0.1605           | 0.8720         | 1.2350                                       | 0.0092                   | 7.6090  | 1.1930 | 8.0172     | 6.5234  |
| Blood    | DDX60L   | 0.1629           | 0.8720         | 1.2250                                       | 0.0092                   | 8.1510  | 0.9910 | 8.5602     | 7.3577  |
| Blood    | CD300E   | 0.1476           | 0.8720         | 1.0280                                       | 0.0092                   | 8.3860  | 0.7730 | 8.7409     | 7.7125  |
| Blood    | BCL2A1   | 0.1698           | 0.8720         | 1.0060                                       | 0.0092                   | 9.5770  | 0.8610 | 9.9149     | 8.9210  |
| Blood    | IFIT3    | 0.1559           | 0.8590         | 1.5710                                       | 0.0125                   | 9.5170  | 1.4160 | 10.0205    | 8.4119  |
| Blood    | EPST11   | 0.1313           | 0.8590         | 1.4240                                       | 0.0125                   | 7.7100  | 1.1170 | 8.2007     | 6.7570  |
| Blood    | FOLR3    | 0.0774           | 0.8590         | 1.2110                                       | 0.0125                   | 8.4650  | 0.9710 | 8.8406     | 7.4311  |
| Blood    | NMI      | 0.1449           | 0.8590         | 1.0040                                       | 0.0125                   | 7.4720  | 0.7640 | 7.7892     | 6.8581  |

**RSV+nRSV vs. asRV**

| Specimen | Gene    | Signed loading # | Univariate AUC | Hodges-Lehmann estimate of log2(fold-change) | 2-sided Wilcoxon p-value | Mean    | SD     | PM RSV+sPV | PM asPV |
|----------|---------|------------------|----------------|----------------------------------------------|--------------------------|---------|--------|------------|---------|
| Nasal    | CD163   | 0.1215           | 1.0000         | 1.4330                                       | 0.0012                   | 8.1540  | 0.8780 | 8.4674     | 7.1241  |
| Nasal    | HERC5   | 0.1285           | 0.9870         | 1.8280                                       | 0.0017                   | 5.1970  | 1.1950 | 5.6517     | 3.9580  |
| Nasal    | MX2     | 0.1280           | 0.9870         | 1.3170                                       | 0.0017                   | 7.4340  | 0.8400 | 7.7574     | 6.5101  |
| Nasal    | ISG15   | 0.1089           | 0.9730         | 2.0090                                       | 0.0023                   | 9.0100  | 1.2210 | 9.4917     | 7.5417  |
| Nasal    | RSAD2   | 0.1295           | 0.9730         | 1.5100                                       | 0.0023                   | 6.8600  | 1.2430 | 7.3182     | 5.5145  |
| Nasal    | CD68    | 0.1286           | 0.9730         | 1.0570                                       | 0.0023                   | 6.7690  | 0.6660 | 6.9923     | 5.9512  |
| Nasal    | LRRC74B | -0.1378          | 0.9600         | -1.9400                                      | 0.0030                   | 6.0910  | 1.2240 | 5.6530     | 7.5173  |
| Nasal    | IFIT3   | 0.1262           | 0.9600         | 1.7200                                       | 0.0030                   | 9.7030  | 1.1290 | 10.1127    | 8.4454  |
| Nasal    | IFITM1  | 0.1256           | 0.9600         | 1.3820                                       | 0.0030                   | 10.6990 | 0.7360 | 11.0670    | 9.6769  |
| Nasal    | ST3GAL6 | 0.1342           | 0.9600         | 1.2570                                       | 0.0030                   | 5.1830  | 0.9160 | 5.4408     | 4.2087  |
| Nasal    | OASL    | 0.1100           | 0.9600         | 1.2500                                       | 0.0030                   | 7.3010  | 0.9890 | 7.5900     | 6.2889  |
| Nasal    | DDX58   | 0.1196           | 0.9600         | 1.1800                                       | 0.0030                   | 6.4110  | 0.8420 | 6.7278     | 5.4799  |
| Nasal    | NEK5    | -0.1183          | 0.9600         | -1.0400                                      | 0.0030                   | 5.5250  | 0.6970 | 5.2434     | 6.3217  |
| Nasal    | IFIT1   | 0.1013           | 0.9470         | 2.3010                                       | 0.0040                   | 6.9690  | 1.7660 | 7.5723     | 5.0402  |

| Specimen | Gene     | Signed loading # | Univariate AUC | Hodges-Lehmann estimate of log2(fold-change) | 2-sided Wilcoxon p-value | Mean    | SD     | PM RSV+sPV | PM asPV |
|----------|----------|------------------|----------------|----------------------------------------------|--------------------------|---------|--------|------------|---------|
| Nasal    | CCL3L3   | 0.1288           | 0.9470         | 1.7450                                       | 0.0040                   | 5.7840  | 1.4800 | 6.0797     | 4.3760  |
| Nasal    | CARD16   | 0.1433           | 0.9470         | 1.2580                                       | 0.0040                   | 9.2140  | 1.1280 | 9.4318     | 8.1227  |
| Nasal    | LRP2BP   | -0.1028          | 0.9470         | -1.1560                                      | 0.0040                   | 2.3400  | 0.7200 | 2.0063     | 3.2787  |
| Nasal    | DYNC2L11 | -0.1148          | 0.9470         | -1.1500                                      | 0.0040                   | 4.7710  | 0.8780 | 4.4701     | 5.5816  |
| Nasal    | DTHD1    | -0.1451          | 0.9330         | -1.5970                                      | 0.0052                   | 4.7940  | 1.1200 | 4.3955     | 5.9136  |
| Nasal    | VWA3B    | -0.1373          | 0.9330         | -1.5170                                      | 0.0052                   | 4.7830  | 1.0220 | 4.4229     | 5.7384  |
| Nasal    | FABP6    | -0.1429          | 0.9330         | -1.5160                                      | 0.0052                   | 6.2130  | 1.0150 | 5.8050     | 7.4868  |
| Nasal    | FCER1G   | 0.1400           | 0.9330         | 1.4690                                       | 0.0052                   | 9.8900  | 1.2960 | 10.1492    | 8.6874  |
| Nasal    | MORN5    | -0.1374          | 0.9330         | -1.4170                                      | 0.0052                   | 5.2590  | 0.9090 | 4.9349     | 6.2758  |
| Nasal    | CES4A    | -0.1237          | 0.9330         | -1.3130                                      | 0.0052                   | 6.0580  | 1.1160 | 5.7797     | 7.2488  |
| Nasal    | IFITM3   | 0.1214           | 0.9330         | 1.2240                                       | 0.0052                   | 10.6760 | 0.7460 | 11.0584    | 9.8306  |
| Nasal    | IL1RN    | 0.1343           | 0.9330         | 1.1150                                       | 0.0052                   | 7.9110  | 0.9810 | 8.0820     | 6.9186  |
| Nasal    | LRRIQ1   | -0.1431          | 0.9200         | -2.0790                                      | 0.0068                   | 5.0670  | 1.5030 | 4.5120     | 6.5462  |
| Nasal    | IFIT2    | 0.1272           | 0.9200         | 1.8630                                       | 0.0068                   | 7.8720  | 1.4000 | 8.3604     | 6.4711  |
| Nasal    | DDX60L   | 0.1420           | 0.9200         | 1.7070                                       | 0.0068                   | 6.9030  | 1.2330 | 7.3280     | 5.5876  |
| Nasal    | FANK1    | -0.1483          | 0.9200         | -1.4490                                      | 0.0068                   | 6.3690  | 1.0320 | 5.9746     | 7.4700  |
| Nasal    | DSC2     | 0.1278           | 0.9200         | 1.4150                                       | 0.0068                   | 5.5670  | 1.1130 | 5.8442     | 4.4950  |
| Nasal    | CD164L2  | -0.1399          | 0.9200         | -1.2630                                      | 0.0068                   | 6.2480  | 0.8750 | 5.9466     | 7.2005  |
| Nasal    | DNAH11   | -0.1409          | 0.9200         | -1.2280                                      | 0.0068                   | 5.7360  | 0.9490 | 5.5016     | 6.6566  |
| Nasal    | TSPAN19  | -0.1295          | 0.9200         | -1.1450                                      | 0.0068                   | 3.5100  | 0.8880 | 3.1476     | 4.4443  |
| Nasal    | EMP3     | 0.1331           | 0.9200         | 1.1110                                       | 0.0068                   | 8.6000  | 0.8250 | 8.8100     | 7.7511  |
| Nasal    | DNAH10   | -0.1269          | 0.9200         | -1.0680                                      | 0.0068                   | 4.9300  | 0.7900 | 4.6504     | 5.8872  |
| Nasal    | PSTPIP2  | 0.1236           | 0.9200         | 1.0280                                       | 0.0068                   | 4.8130  | 1.0730 | 5.0099     | 3.8735  |
| Nasal    | SERPINB9 | 0.1306           | 0.9200         | 1.0100                                       | 0.0068                   | 6.8070  | 0.9530 | 7.1065     | 6.1106  |
| Nasal    | NEK10    | -0.1490          | 0.9070         | -2.1000                                      | 0.0088                   | 5.0870  | 1.3690 | 4.6355     | 6.5083  |
| Nasal    | SPAG17   | -0.1443          | 0.9070         | -2.0120                                      | 0.0088                   | 3.6750  | 1.3710 | 3.1146     | 5.3137  |
| Nasal    | C3AR1    | 0.1236           | 0.9070         | 1.9130                                       | 0.0088                   | 6.2400  | 1.6290 | 6.6319     | 4.7398  |
| Nasal    | EFHB     | -0.1406          | 0.9070         | -1.7950                                      | 0.0088                   | 5.2270  | 1.2650 | 4.7334     | 6.4648  |
| Nasal    | CFAP206  | -0.1412          | 0.9070         | -1.7240                                      | 0.0088                   | 4.4220  | 1.1210 | 3.9797     | 5.5815  |
| Nasal    | EFHC1    | -0.1475          | 0.9070         | -1.6260                                      | 0.0088                   | 5.2760  | 1.1580 | 4.8113     | 6.5278  |
| Nasal    | TEX26    | -0.1397          | 0.9070         | -1.6070                                      | 0.0088                   | 3.4870  | 1.1080 | 3.0957     | 4.6660  |
| Nasal    | RSPH10B2 | -0.1378          | 0.9070         | -1.5880                                      | 0.0088                   | 6.0590  | 1.1580 | 5.6093     | 7.2315  |
| Nasal    | DNAI1    | -0.1430          | 0.9070         | -1.5400                                      | 0.0088                   | 7.3430  | 1.0710 | 6.9585     | 8.4726  |
| Nasal    | RGS1     | 0.1026           | 0.9070         | 1.4940                                       | 0.0088                   | 4.6280  | 1.1290 | 4.9690     | 3.4897  |
| Nasal    | SPA17    | -0.1393          | 0.9070         | -1.4020                                      | 0.0088                   | 6.1110  | 0.9720 | 5.6642     | 7.0910  |
| Nasal    | LRRC23   | -0.1418          | 0.9070         | -1.3730                                      | 0.0088                   | 6.9210  | 1.1180 | 6.5277     | 8.0074  |
| Nasal    | IFIH1    | 0.1249           | 0.9070         | 1.3700                                       | 0.0088                   | 6.2910  | 0.9650 | 6.6816     | 5.2676  |
| Nasal    | DNAAF1   | -0.1448          | 0.9070         | -1.2120                                      | 0.0088                   | 6.1100  | 0.8750 | 5.7603     | 6.9783  |
| Nasal    | P2RY14   | 0.1276           | 0.9070         | 1.1910                                       | 0.0088                   | 5.6670  | 1.1390 | 5.9605     | 4.6647  |
| Nasal    | CCRL2    | 0.1278           | 0.9070         | 1.1850                                       | 0.0088                   | 7.8730  | 1.3890 | 8.0430     | 6.4391  |
| Nasal    | CARD17   | 0.1301           | 0.9070         | 1.0900                                       | 0.0088                   | 3.6070  | 1.0830 | 3.8148     | 2.7379  |
| Nasal    | IER5     | 0.1296           | 0.9070         | 1.0570                                       | 0.0088                   | 5.1020  | 0.8790 | 5.3168     | 4.2248  |
| Nasal    | NFKBIA   | 0.1283           | 0.9070         | 1.0560                                       | 0.0088                   | 8.0230  | 1.2060 | 8.1608     | 6.9815  |
| Nasal    | IFT81    | -0.1205          | 0.9070         | -1.0120                                      | 0.0088                   | 4.1840  | 0.7320 | 3.9480     | 4.9828  |
| Blood    | TLR7     | 0.1515           | 1.0000         | 1.0770                                       | 0.0002                   | 7.1230  | 0.8010 | 7.3261     | 6.2630  |
| Blood    | MS4A4A   | 0.1304           | 0.9690         | 1.3420                                       | 0.0009                   | 5.5900  | 0.9830 | 6.0132     | 4.5898  |
| Blood    | TMEM167A | 0.1227           | 0.9540         | 1.0350                                       | 0.0016                   | 8.4450  | 0.9040 | 8.8077     | 7.7670  |
| Blood    | IFITM3   | 0.1384           | 0.9380         | 1.2800                                       | 0.0028                   | 11.4150 | 0.9270 | 11.8027    | 10.6414 |
| Blood    | IL1RL1   | -0.0976          | 0.9380         | -1.1890                                      | 0.0028                   | 5.3340  | 0.8420 | 4.9810     | 6.0870  |
| Blood    | TCN2     | 0.1326           | 0.9380         | 1.1450                                       | 0.0028                   | 6.9410  | 0.8050 | 7.2515     | 6.1781  |
| Blood    | TNFSF10  | 0.1330           | 0.9380         | 1.1330                                       | 0.0028                   | 9.5920  | 0.8980 | 9.9599     | 9.0070  |
| Blood    | KIF20A   | 0.1054           | 0.9380         | 1.0130                                       | 0.0028                   | 4.9920  | 0.6720 | 5.2638     | 4.3490  |
| Blood    | IGLV3-19 | 0.1195           | 0.9230         | 1.5720                                       | 0.0044                   | 8.4860  | 1.0350 | 9.0104     | 7.3560  |
| Blood    | IGLV2-14 | 0.1265           | 0.9230         | 1.2440                                       | 0.0044                   | 10.7490 | 0.8800 | 11.1917    | 9.8029  |
| Blood    | IGLV2-11 | 0.1178           | 0.9230         | 1.2310                                       | 0.0044                   | 9.2230  | 0.9050 | 9.6204     | 8.3741  |
| Blood    | LY6E     | 0.1522           | 0.9080         | 1.2950                                       | 0.0068                   | 9.8370  | 0.9970 | 10.1548    | 8.8880  |
| Blood    | FOLR3    | 0.0549           | 0.9080         | 1.2270                                       | 0.0068                   | 8.4680  | 0.9130 | 8.8406     | 7.6400  |

| Specimen | Gene      | Signed loading # | Univariate AUC | Hodges-Lehmann estimate of log2(fold-change) | 2-sided Wilcoxon p-value | Mean    | SD     | PM RSV+sPV | PM asPV |
|----------|-----------|------------------|----------------|----------------------------------------------|--------------------------|---------|--------|------------|---------|
| Blood    | CAPG      | 0.1255           | 0.9080         | 1.0770                                       | 0.0068                   | 8.4960  | 0.7380 | 8.8557     | 7.7972  |
| Blood    | ISG15     | 0.1404           | 0.8920         | 1.3980                                       | 0.0098                   | 8.8720  | 1.3270 | 9.3211     | 7.7049  |
| Blood    | MCEMP1    | 0.1129           | 0.8920         | 1.2880                                       | 0.0098                   | 8.1440  | 1.3060 | 8.4945     | 7.1217  |
| Blood    | BST1      | 0.1136           | 0.8920         | 1.1080                                       | 0.0098                   | 9.5170  | 0.9100 | 9.8542     | 8.9482  |
| Blood    | IGLV2-18  | 0.1108           | 0.8920         | 1.0970                                       | 0.0098                   | 8.9870  | 0.8570 | 9.3435     | 8.2356  |
| Blood    | IGHV3-53  | 0.1308           | 0.8920         | 1.0820                                       | 0.0098                   | 8.4400  | 0.7040 | 8.7923     | 7.7897  |
| Blood    | CARD17    | 0.1180           | 0.8920         | 1.0390                                       | 0.0098                   | 5.0660  | 1.1930 | 5.2376     | 4.1618  |
| Blood    | SERPING1  | 0.1356           | 0.8770         | 2.1690                                       | 0.0140                   | 5.5430  | 1.8120 | 6.0957     | 3.9131  |
| Blood    | USP41     | 0.1444           | 0.8770         | 1.7450                                       | 0.0140                   | 7.3970  | 1.7140 | 7.8144     | 5.9732  |
| Blood    | IGHV3-66  | 0.1376           | 0.8770         | 1.6110                                       | 0.0140                   | 8.0340  | 1.1600 | 8.4419     | 7.0321  |
| Blood    | IFI6      | 0.1441           | 0.8770         | 1.5500                                       | 0.0140                   | 8.8750  | 1.2150 | 9.3202     | 7.8015  |
| Blood    | IL5RA     | -0.1130          | 0.8770         | -1.4760                                      | 0.0140                   | 7.6290  | 1.1690 | 7.1972     | 8.4735  |
| Blood    | HIST1H3B  | 0.1234           | 0.8770         | 1.3900                                       | 0.0140                   | 5.9440  | 1.0710 | 6.4097     | 5.0199  |
| Blood    | C3AR1     | 0.1224           | 0.8770         | 1.3850                                       | 0.0140                   | 8.0490  | 0.9220 | 8.4278     | 7.0394  |
| Blood    | S100A12   | 0.0984           | 0.8770         | 1.3730                                       | 0.0140                   | 10.7750 | 1.2620 | 11.2749    | 9.8336  |
| Blood    | SPATS2L   | 0.1461           | 0.8770         | 1.2750                                       | 0.0140                   | 7.1290  | 1.3870 | 7.4412     | 5.9573  |
| Blood    | TNFAIP6   | 0.1085           | 0.8770         | 1.2650                                       | 0.0140                   | 7.7720  | 1.1230 | 8.0625     | 6.8808  |
| Blood    | RSAD2     | 0.1324           | 0.8770         | 1.1370                                       | 0.0140                   | 7.1670  | 1.1410 | 7.5336     | 6.2406  |
| Blood    | VNN1      | 0.0628           | 0.8770         | 1.0520                                       | 0.0140                   | 7.3650  | 1.2200 | 7.7483     | 6.6813  |
| Blood    | CHI3L1    | -0.0803          | 0.8620         | -1.5000                                      | 0.0194                   | 6.8880  | 1.2390 | 6.4054     | 7.7494  |
| Blood    | IGLL5     | 0.1253           | 0.8620         | 1.3970                                       | 0.0194                   | 10.4200 | 0.9080 | 10.8531    | 9.5418  |
| Blood    | OAS1      | 0.1475           | 0.8620         | 1.2330                                       | 0.0194                   | 10.3190 | 1.0710 | 10.7586    | 9.4734  |
| Blood    | IGHV4-59  | 0.1227           | 0.8620         | 1.1030                                       | 0.0194                   | 5.5310  | 0.7830 | 5.8878     | 4.7429  |
| Blood    | IGLV1-40  | 0.0924           | 0.8620         | 1.0510                                       | 0.0194                   | 7.8280  | 0.9790 | 8.0333     | 7.0370  |
| Blood    | LACTB2    | 0.1150           | 0.8620         | 1.0450                                       | 0.0194                   | 5.5100  | 0.8120 | 5.8674     | 4.8221  |
| Blood    | ITGB8     | -0.0896          | 0.8620         | -1.0170                                      | 0.0194                   | 2.9410  | 0.6540 | 2.7164     | 3.6057  |
| Blood    | BCL2A1    | 0.1163           | 0.8620         | 1.0000                                       | 0.0194                   | 9.5920  | 0.9510 | 9.9149     | 9.0508  |
| Blood    | KIAA0101  | 0.1197           | 0.8460         | 1.4920                                       | 0.0264                   | 6.0770  | 1.2380 | 6.5542     | 5.0861  |
| Blood    | HIST1H2BM | 0.1303           | 0.8460         | 1.3940                                       | 0.0264                   | 10.5000 | 1.2050 | 11.0264    | 9.3114  |
| Blood    | RALA      | 0.1232           | 0.8460         | 1.1650                                       | 0.0264                   | 6.2570  | 0.7760 | 6.5412     | 5.5124  |
| Blood    | JCHAIN    | 0.1224           | 0.8460         | 1.1370                                       | 0.0264                   | 10.8170 | 1.0770 | 11.2825    | 9.9332  |
| Blood    | OAS2      | 0.1453           | 0.8460         | 1.0690                                       | 0.0264                   | 8.7430  | 1.0300 | 9.0646     | 7.9290  |
| Blood    | MS4A2     | -0.0499          | 0.8460         | -1.0480                                      | 0.0264                   | 4.6230  | 0.7210 | 4.3718     | 5.3192  |
| Blood    | IFIT1     | 0.1292           | 0.8310         | 1.8450                                       | 0.0350                   | 7.5890  | 1.6650 | 8.2249     | 6.2547  |
| Blood    | IFIT3     | 0.1272           | 0.8310         | 1.6840                                       | 0.0350                   | 9.5980  | 1.3990 | 10.0205    | 8.5138  |
| Blood    | ANKRD22   | 0.1260           | 0.8310         | 1.4870                                       | 0.0350                   | 6.2890  | 1.2710 | 6.7449     | 5.3500  |
| Blood    | EPST11    | 0.1224           | 0.8310         | 1.2190                                       | 0.0350                   | 7.8210  | 1.0690 | 8.2007     | 6.9802  |
| Blood    | AIM2      | 0.1182           | 0.8310         | 1.1420                                       | 0.0350                   | 7.1040  | 1.0910 | 7.4436     | 6.2102  |
| Blood    | IGKV1D-39 | 0.1267           | 0.8310         | 1.0680                                       | 0.0350                   | 8.3380  | 0.9450 | 8.6484     | 7.4972  |
| Blood    | E2F8      | 0.1312           | 0.8310         | 1.0590                                       | 0.0350                   | 4.0960  | 0.8680 | 4.3529     | 3.2818  |
| Blood    | USP18     | 0.1369           | 0.8150         | 1.5080                                       | 0.0460                   | 6.8980  | 1.5140 | 7.2980     | 5.7635  |
| Blood    | IGHV3-72  | 0.1200           | 0.8150         | 1.2980                                       | 0.0460                   | 7.2780  | 1.2050 | 7.7293     | 6.3094  |
| Blood    | IGHV3-73  | 0.1173           | 0.8150         | 1.1070                                       | 0.0460                   | 6.4110  | 0.9300 | 6.7872     | 5.5361  |
| Blood    | IGHV3-48  | 0.1223           | 0.8150         | 1.0660                                       | 0.0460                   | 6.2840  | 0.8880 | 6.6639     | 5.6755  |
| Blood    | IGLV1-47  | 0.1100           | 0.8150         | 1.0550                                       | 0.0460                   | 7.7780  | 0.9020 | 8.0802     | 6.9538  |
| Blood    | IGLC3     | 0.1183           | 0.8150         | 1.0040                                       | 0.0460                   | 11.1840 | 0.8130 | 11.4948    | 10.4998 |
| Blood    | CCR3      | -0.0994          | 0.8150         | -1.0020                                      | 0.0460                   | 4.9910  | 0.9330 | 4.6742     | 5.8186  |
| Blood    | HERC5     | 0.1296           | 0.8000         | 1.5790                                       | 0.0593                   | 7.0640  | 1.5040 | 7.6505     | 5.9005  |
| Blood    | IGHV4-39  | 0.1342           | 0.8000         | 1.3130                                       | 0.0593                   | 10.9720 | 0.8700 | 11.3392    | 10.2141 |
| Blood    | CMPK2     | 0.1303           | 0.8000         | 1.3060                                       | 0.0593                   | 7.0530  | 1.2250 | 7.4370     | 6.1088  |
| Blood    | IGHV4-28  | 0.1302           | 0.8000         | 1.2940                                       | 0.0593                   | 8.1530  | 0.8370 | 8.4429     | 7.3178  |
| Blood    | MX1       | 0.1270           | 0.8000         | 1.2230                                       | 0.0593                   | 9.5310  | 1.0780 | 9.9044     | 8.7518  |
| Blood    | GMNN      | 0.1282           | 0.8000         | 1.2220                                       | 0.0593                   | 5.0840  | 0.9140 | 5.3637     | 4.2993  |
| Blood    | CCNB2     | 0.1074           | 0.8000         | 1.0060                                       | 0.0593                   | 5.5280  | 0.9850 | 5.8375     | 4.8073  |

Note: PM, pseudomedian
