# Supplementary material
Source: PubMed Central journal article supplement (PMC6420164)
Supplement: jiy608_suppl_supplementary_table_s6.pdf [file jiy608_suppl_supplementary_table_s6.pdf]

**Table S6. Performance of polygenic classification scores constructed using nested cross-validated modified supervised principal components, by sample type and comparison group.**

| Sample type  | Comparison        | Nested CV AUC | Univariate AUC threshold | Fold-change threshold | No. genes included in classifier |
|--------------|-------------------|---------------|--------------------------|-----------------------|----------------------------------|
| <b>NP</b>    | nRSV vs. Ctrl     | 1             | 1                        | 16                    | 3                                |
| <b>NP</b>    | nRSV vs. asRV     | 0.78          | 1                        | 2                     | 3                                |
| <b>NP</b>    | RSV vs. Ctrl      | 1             | 1                        | 16                    | 6                                |
| <b>NP</b>    | nRSV vs. RSV      | 0.65          | 0.9                      | 4                     | 1                                |
| <b>NP</b>    | asRV vs. Ctrl     | 0.93          | 1                        | 2                     | 77                               |
| <b>NP</b>    | RSV+nRSV vs. Ctrl | 1             | 1                        | 16                    | 3                                |
| <b>NP</b>    | RSV+nRSV vs. asRV | 0.81          | 0.9                      | 2                     | 58                               |
|              |                   |               |                          |                       |                                  |
| <b>Blood</b> | nRSV vs. Ctrl     | 0.94          | 1                        | 2                     | 3                                |
| <b>Blood</b> | nRSV vs. asRV     | 0.71          | 0.9                      | 2                     | 12                               |
| <b>Blood</b> | RSV vs. Ctrl      | 0.92          | 1                        | 8                     | 1                                |
| <b>Blood</b> | nRSV vs. RSV      | 0.79          | 1                        | 2                     | 14                               |
| <b>Blood</b> | asRV vs. Ctrl     | 0.48          | 1                        | 2                     | 1                                |
| <b>Blood</b> | RSV+nRSV vs. Ctrl | 0.82          | 0.85                     | 2                     | 43                               |
| <b>Blood</b> | RSV+nRSV vs. asRV | 0.8           | 0.8                      | 2                     | 67                               |
